# Supplementary material
Source: PubMed Central journal article supplement (PMC7091463)
Supplement: mmc1.pdf [file mmc1.pdf]

**Biophysical Journal, Volume 118**

**Supplemental Information**

**Dynamical Organization of Compositionally Distinct Inner and Outer  
Membrane Lipids of Mycobacteria**

**Pranav Adhyapak, Aswin T. Srivatsav, Manjari Mishra, Abhishek Singh, Rishikesh  
Narayan, and Shobhna Kapoor**

## SI Methods

**Laurdan GP spectroscopy:** Being a solvation sensitive probe, Laurdan is employed to determine the hydration and order of membranes. The emission spectra of Laurdan exhibit spectral shifts due to dielectric relaxation and can be analysed by calculating the generalised polarisation using Eq. S1.

$$GP = \frac{I_{440} - I_{490}}{I_{440} + I_{490}} \quad (S1)$$

Where,  $I_{440}$  and  $I_{490}$  refer to the intensities at 440 nm and 490 nm characteristic for ordered (gel) phase and fluid, liquid crystalline phase respectively.

**Membrane fluidity studies:** Fluorescence anisotropy measurements were done using Laurdan, TMA-DPH and DPH using a Varian Cary Eclipse spectrofluorometer attached with a polarizer (varian manual Polarizer Accessory). Fluorescence intensity was measured with excitation and emission polarizer parallel to each other (both at  $0^\circ$ ,  $I_0$ ) and repeated with polarizer perpendicular (excitation:  $0^\circ$ , emission:  $90^\circ$ ,  $I_{90}$ ). The degree of fluorescence steady-state anisotropy ( $r$ ) was calculated from Eq. S2.

$$r = \frac{I_{ii} - (G * I_{\perp})}{I_{ii} + (2G * I_{\perp})} \quad (S2)$$

where,  $G$  is the correction factor obtained from ratio of emission intensity at  $0^\circ$  and  $90^\circ$  with the excitation polarizer oriented at  $90^\circ$ .

**AFM Force Spectroscopy:** Force spectroscopy was performed to gain insights into the resistance experienced by cantilever tip to rupture the bilayer. In this approach, force distance curves were recorded. The supported lipid bilayer is considered as a planar arrangement of adjacent lipid molecules. As the tip approach and indent the bilayer, the latter gets compressed, the molecular area underneath the tip changes and lipid positions fluctuate. Between the adjacent molecules of lipids, energy is elastically stored until the rupture point occurs. This creates a jump in force-distance curve, as the tip pierces through the bilayer. This jump is considered as breakthrough force event.

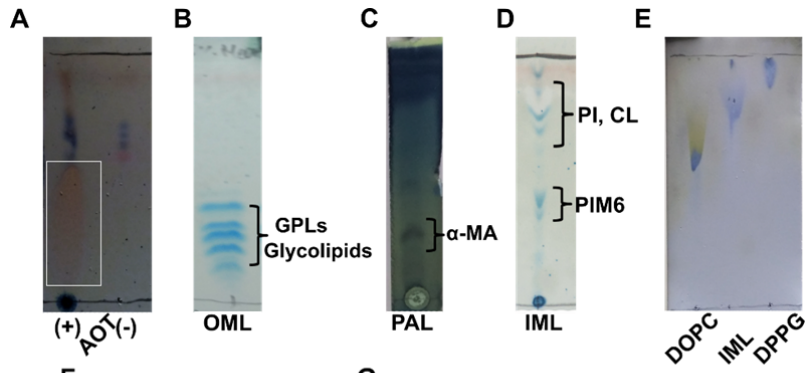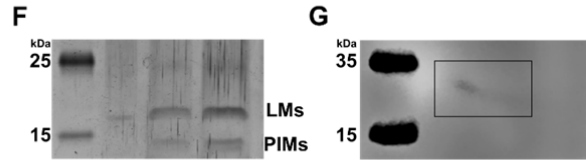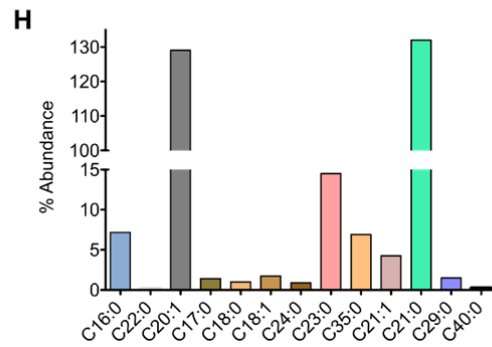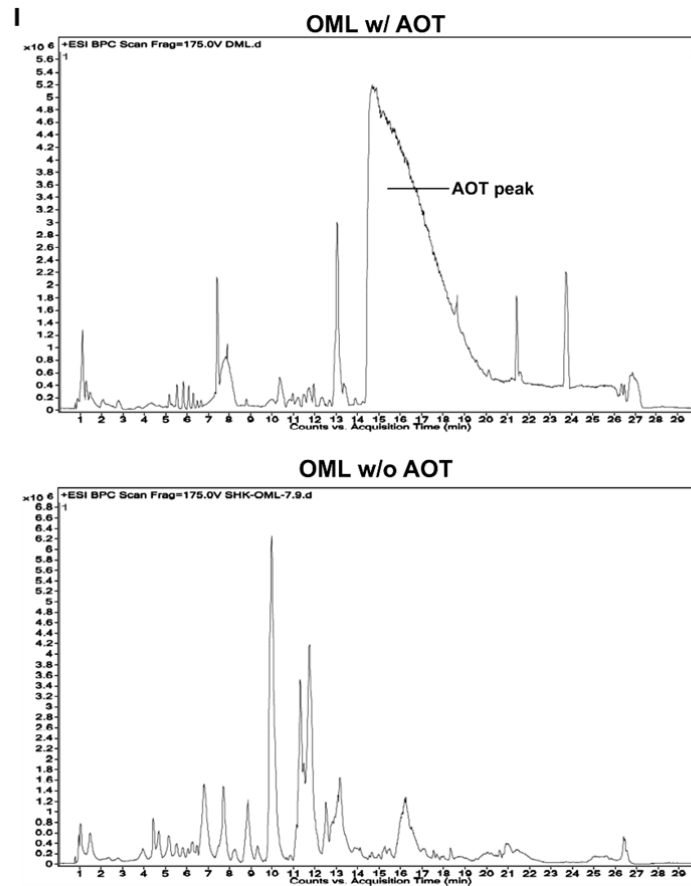

**Fig. S1** - (A-E) TLC profiles of extracted lipids. (A) TLC profile of OML with and without AOT developed in chloroform-methanol mixture (C:M) (9:1). The long ochre coloured spot confirmed the presence of AOT. (B) OML TLC developed in C:M (9.5:0.5). GPLs and glycolipids were visualized using anthrone spray. (C) Mycolic acid methyl esters developed in pet ether-diethyl ether (PE:DE) (85:15) and visualized using phosphomolybdic acid stain (PMA). (D) Glycolipids in IML were visualized using anthrone spray and developed in a mixture of chloroform-methanol-13M ammonia-1 M ammonium acetate-water (180:140:9:9:23). (E) Comparison of standard phospholipids with IML showed the mobility of IML being at an intermediate between DOPC and DPPG. (F) SDS PAGE profile of PIMs and LMs. (G) Western blot of LAM observed using anti-LAM antibody. (H) Fatty acid methyl esters of IML were subjected to GCMS to obtain information on the constituent fatty acids chains. (I) LCMS spectra showing the presence and absence of AOT before and after purification using column chromatography as described in Methods.

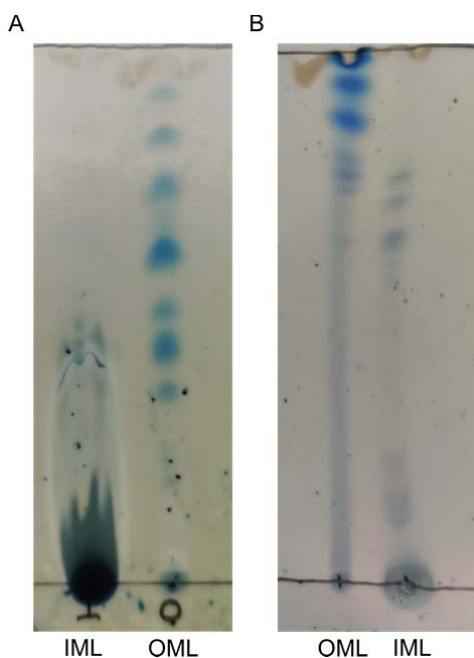

**Figure S2** – Comparative TLC profiles of the lipids in OML and IML fractions detected using solvents of different polarity. A) in chloroform-methanol (9.7:0.3) and B) in chloroform-methanol-water (100:14:0.8). Both are visualized using anthrone spray.

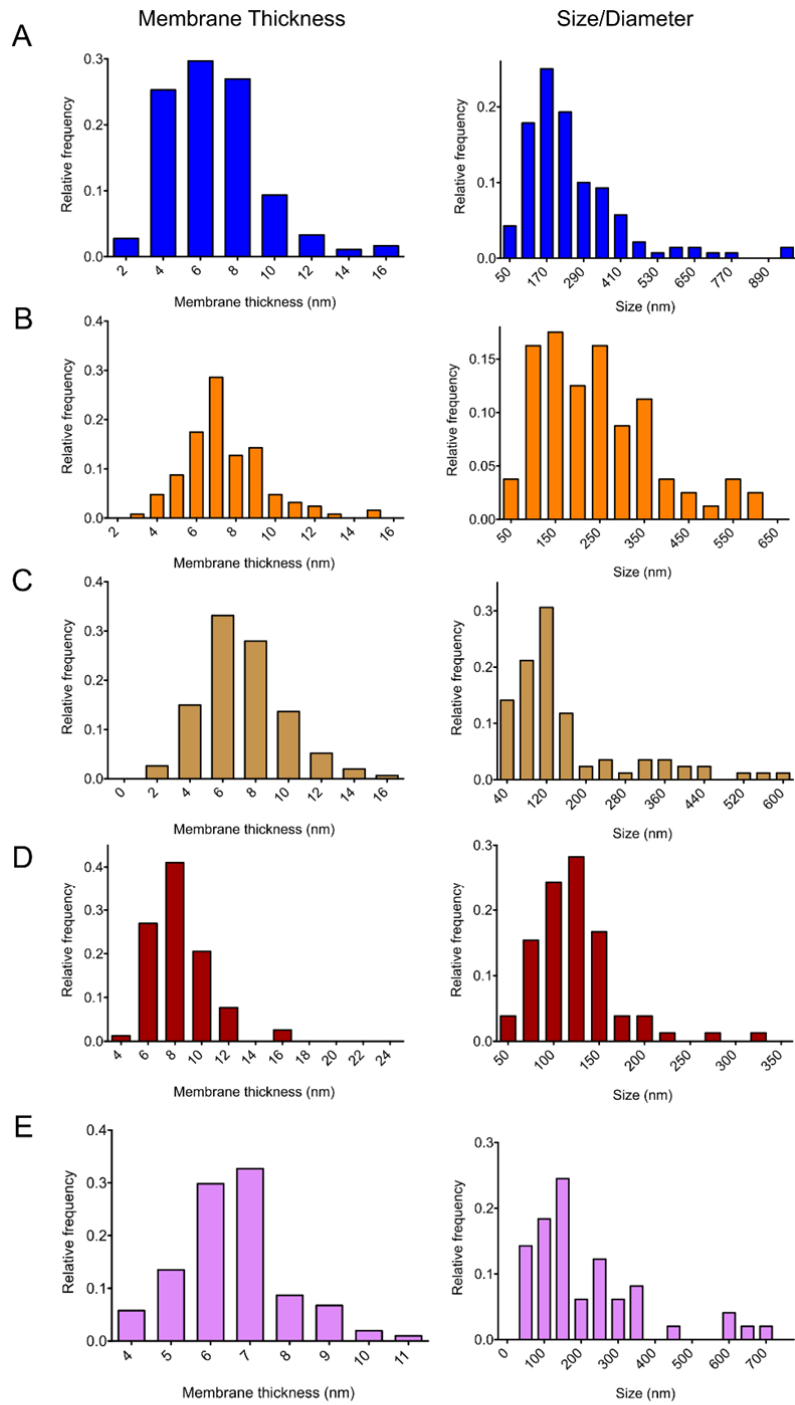

**F**

| Lipid System | Mean zeta potential $\pm$ SD (mV) |
|--------------|-----------------------------------|
| IML          | -24.71 $\pm$ 0.60                 |
| OML          | -16.82 $\pm$ 0.31                 |
| OLP          | -21.24 $\pm$ 0.46                 |
| OL           | -17.88 $\pm$ 0.50                 |
| OP           | -17.73 $\pm$ 0.50                 |

**Fig. S3:** Distribution of bilayer thickness and size of the mycobacterial lipid vesicles estimated from Cryo-TEM images. Bilayer thickness varies as (A)  $6.7 \pm 0.2$  nm for IML (n=60), (B)  $7.4 \pm 0.2$  nm for OML (n=42), (C)  $7.3 \pm 0.2$  nm for OLP (n=50), (D)  $8.3 \pm 0.2$  nm for OL (n=34), and (E)  $6.6 \pm 0.1$  nm for OP (n=29) (mean  $\pm$ SEM). Diameter/ size for IML, OML, OLP, OL and OP vesicles are  $247.8 \pm 13.3$  nm (n=140),  $241.8 \pm 14.7$  nm (n=80),  $159.4 \pm 13.4$  nm (n=85),  $123.4 \pm 5.17$  nm (n=78),  $215.2 \pm 23.2$  nm (n=50) respectively (mean  $\pm$  SEM).

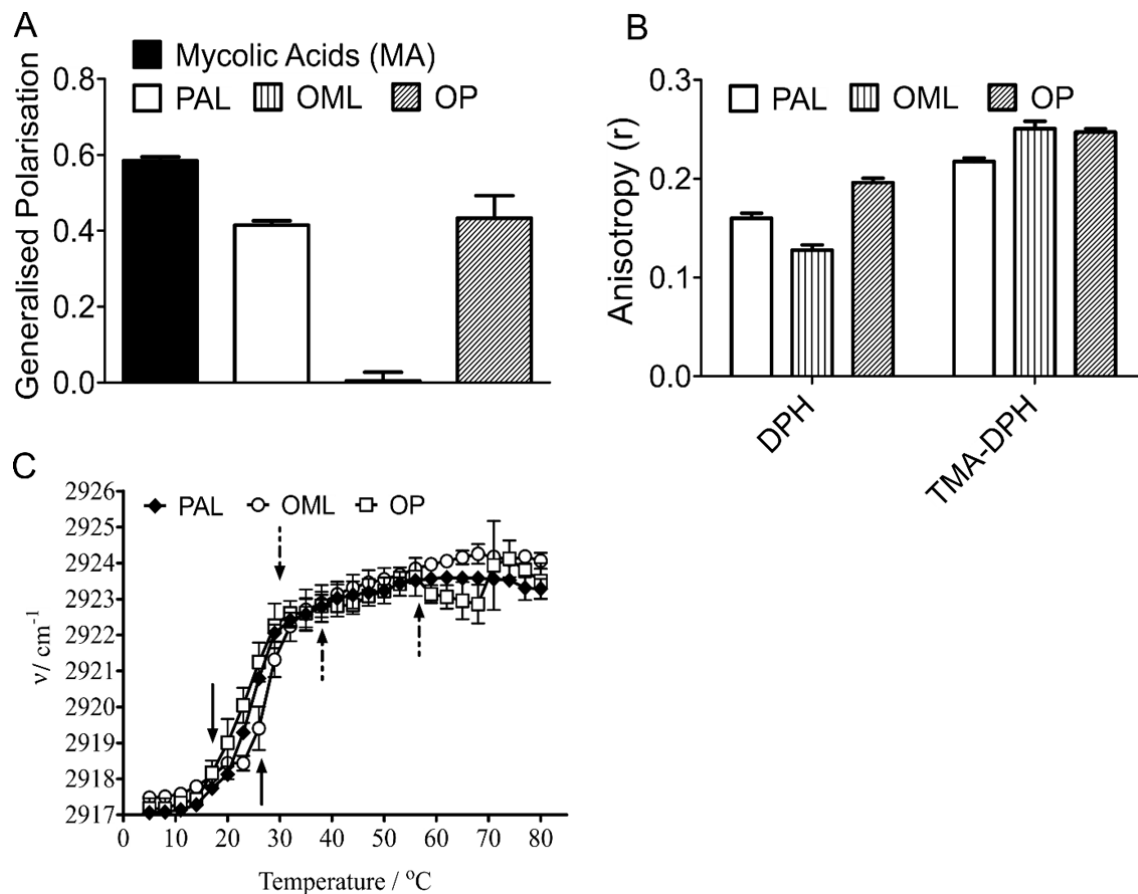

**Fig. S4: PAL induced changes in membrane order and fluidity of mycobacterial outer membrane.** (A) Laurdan GP (B) DPH and TMA-DPH anisotropy showing microviscosity changes in the deep hydrophobic acyl chain region and interfacial region respectively at 35 °C in the indicated lipid systems. Data presented is mean ( $\pm$  SEM) of three independent experiments. (C) Acyl chain conformational dynamics of indicated lipid systems measured using FTIR monitoring  $\nu_{asym}CH_2$ . Black arrows indicate changes in slope, which can be, ascribed to onset of phase transitions. Solid arrows: main phase transition and dashed arrow indicate minor slope change and appearance of additional phases. Data presented is mean  $\pm$  SD of three independent experiments.

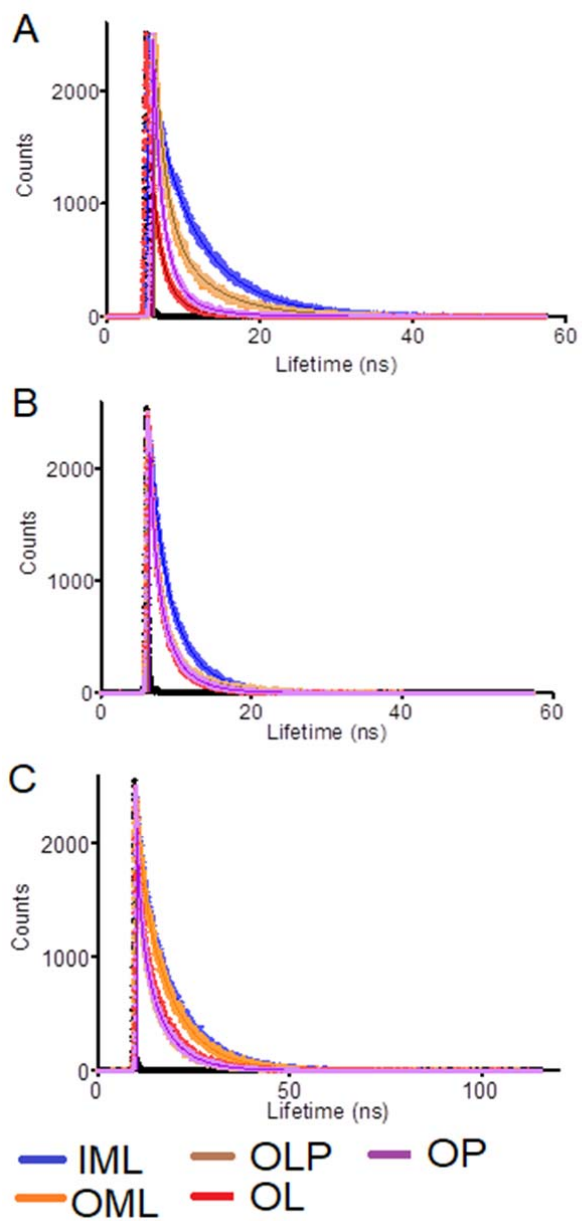

**Fig. S5 – Representative Decay Curves** of (A) Laurdan (B) TMA-DPH (C) DPH probes in various indicated mycobacterial model membrane lipid systems at RT.



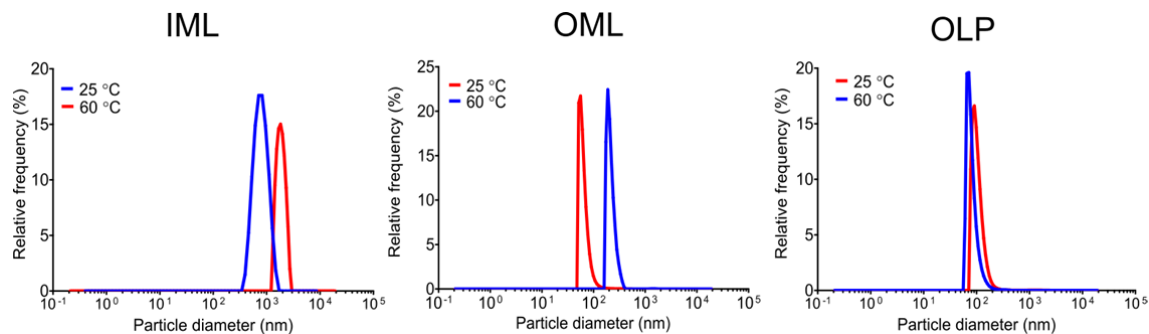

**Fig. S6: Temperature dependent size variation within (A) IML (B) OML (C) OLP, suggesting intact integrity of vesicles at higher temperatures.**

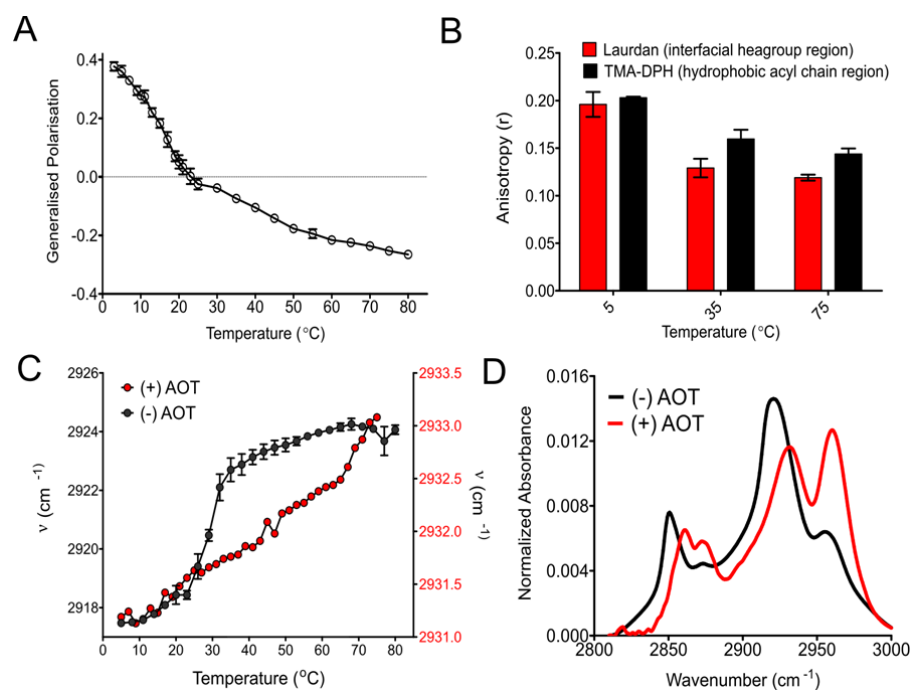

**Fig. S7 – AOT alters the membrane properties of OML** (A) Generalised polarisation curve showing that the presence of AOT reduces the apparent  $T_m$  of the OML system (compared to Fig. 3A). (B) Laurdan and TMA-DPH anisotropy of OML containing AOT. Data presented is mean ( $\pm$  SEM) of three independent experiments. (C) Internal vibrational mode of lipid acyl chains (asymmetric  $\text{CH}_2$ ;  $\nu_{\text{asym}}\text{CH}_2$ ) of OML and OML with AOT. Data is mean ( $\pm$  SD). Presence of AOT causes substantial disordering in the membrane bilayer indicated by higher wavenumbers. In addition, the phase transition is shifted to higher temperature suggesting significant effect on AOT on OM lipid phases (D) When AOT is present, the IR absorbance pattern has

characteristic doublet peaks at both 2920 and 2850 region. Data presented is mean ( $\pm$ SD).

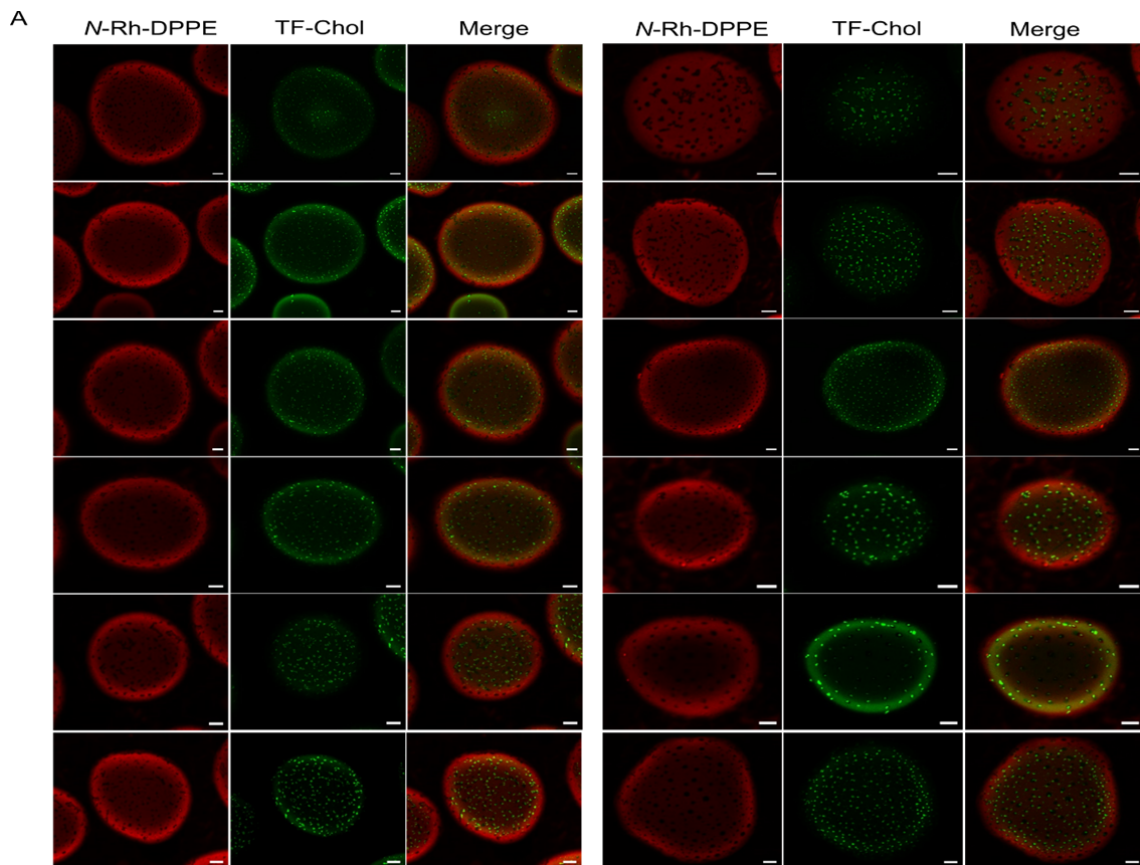

**Fig. S8 – Representative confocal fluorescence microscopy images of IML GUVs.** Fluorescence intensity was collected in two channels at 25 °C. *N*-Rh-DPPE was used as a marker labelling preferentially the  $l_d$  domains (detected by red channel), TopFluor-cholesterol partitions preferentially into  $l_o$  phase of the membrane. Scale bar: 20  $\mu$ m.

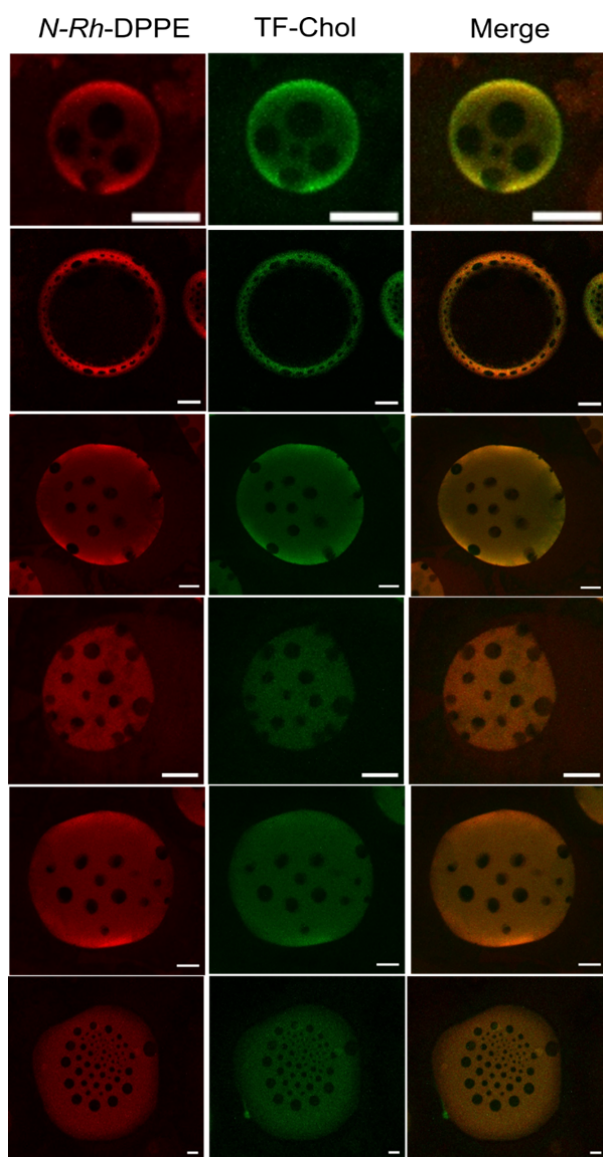

**Fig. S9: Representative confocal fluorescence microscopy images of GUVs with solid-liquid phase separation.** DOPC, DPPC, cholesterol were mixed (45:45:5 mol %) to form GUVs. Fluorescence intensity was collected in two channels at 25 °C. *N-Rh*-DPPE was used as a marker labelling preferentially the  $l_d$  domains (detected by red channel), TopFluor-cholesterol partitions preferentially into  $l_o$  phase of the membrane (green channel). Regions devoid of both the markers reflect the presence of gel phase domains. Scale bar: 20  $\mu$ m.

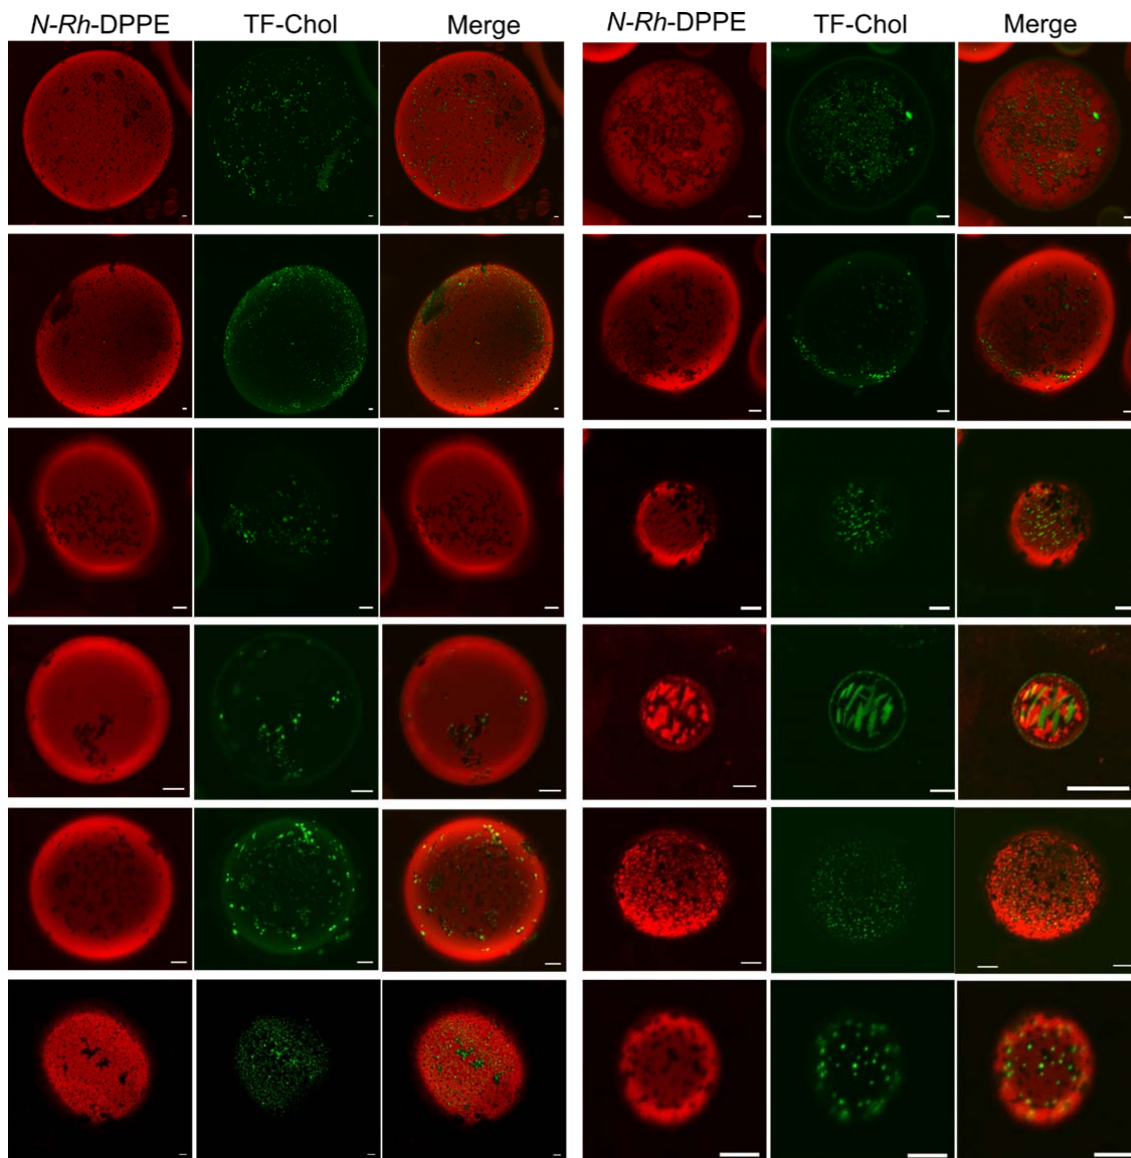

**Fig. S10 – Representative confocal fluorescence microscopy images of OML GUVs.** Fluorescence intensity was collected in two channels at 25 °C. *N-Rh-DPPE* was used as a marker labelling preferentially the  $I_d$  domains (detected by red channel), TopFluor-cholesterol partitions preferentially into  $I_o$  phase of the membrane. Scale bar: 20  $\mu\text{m}$ .

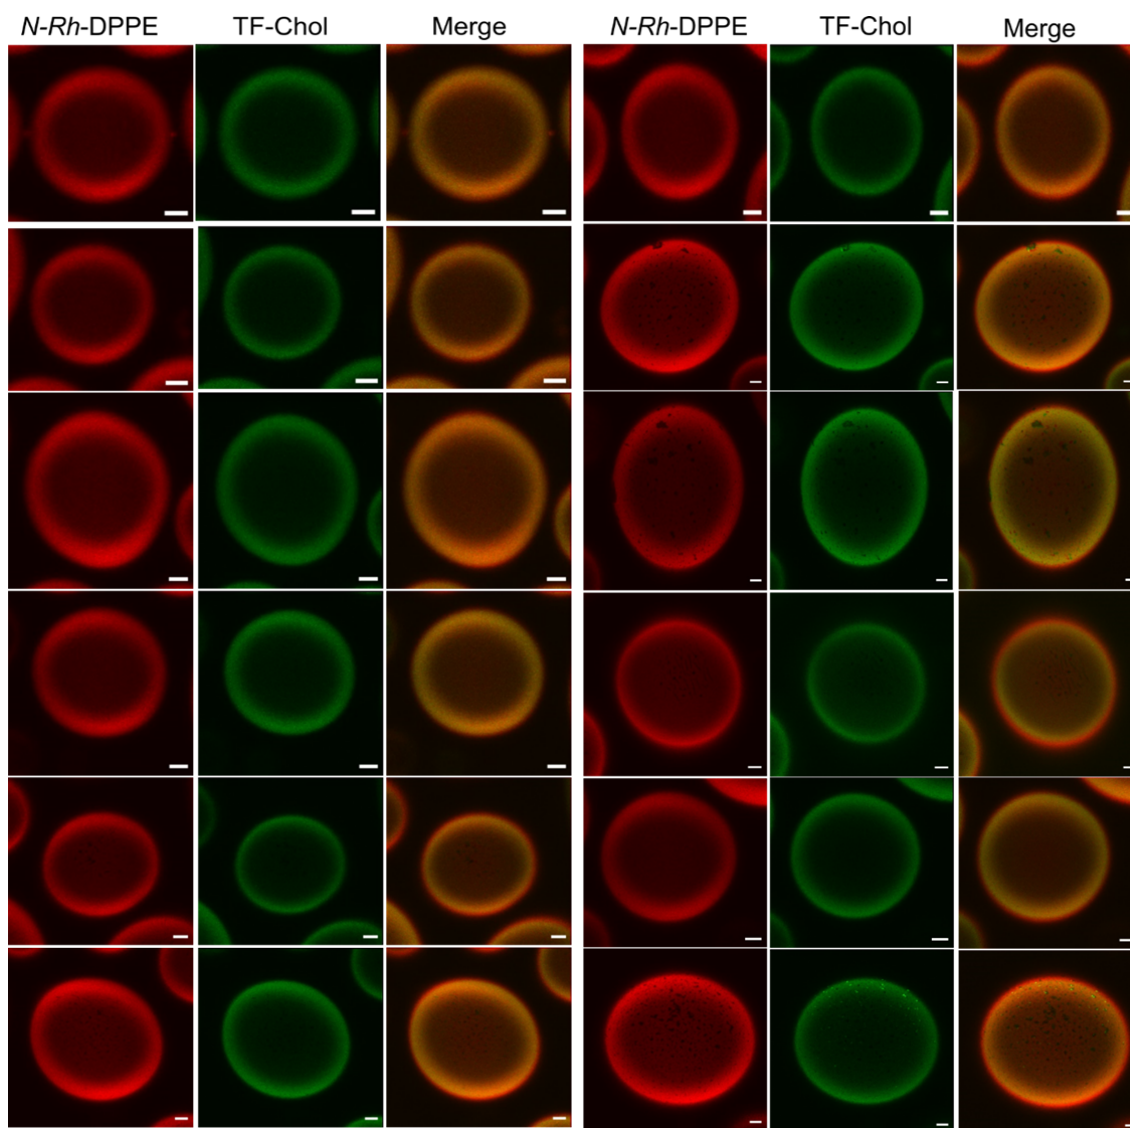

**Fig. S11 – Representative confocal fluorescence microscopy images of OLP GUVs.** Fluorescence intensity was collected in two channels at 25 °C. *N-Rh*-DPPE was used as a marker labelling preferentially the  $I_d$  domains (detected by red channel), TopFluor-cholesterol partitions preferentially into  $I_o$  phase of the membrane. Scale bar: 20  $\mu$ m.



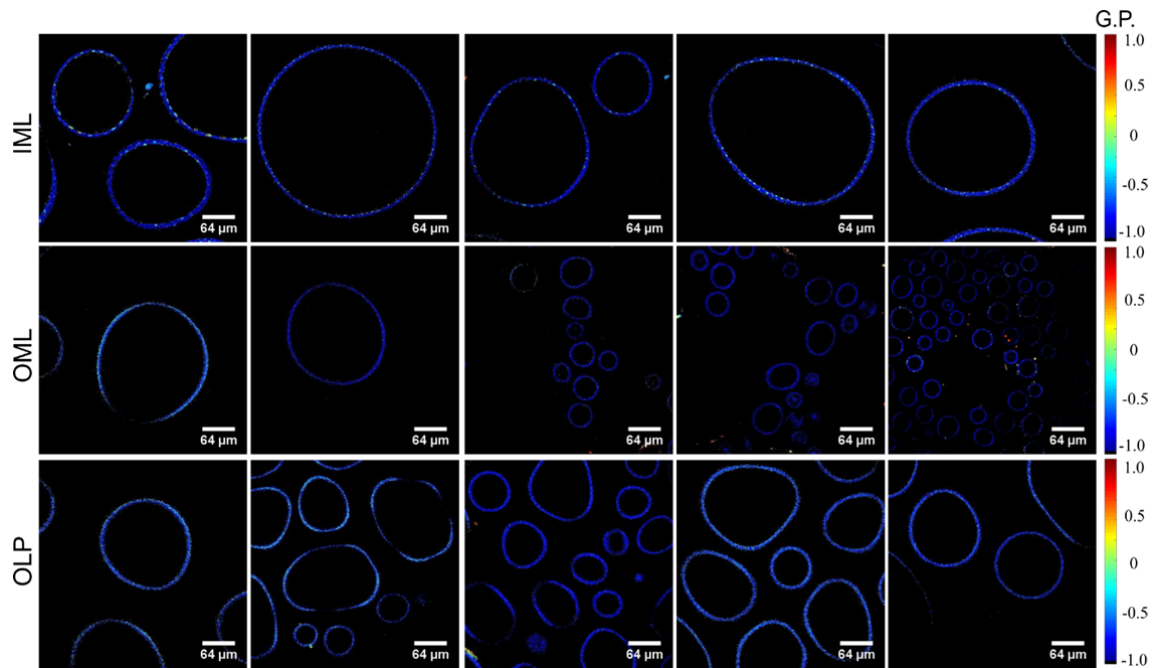

**Fig. S12 – Laurdan GP images of mycobacterial model membrane revealing phase segregation and lipid microdomain formation.** Pseudo-coloured Laurdan GP images of indicated GUVs at 25 °C. Scale Bar 64 µm.

**Table S1: List of lipids identified through LCMS in OML and IML fractions after consulting the online mycobacterial databases. In bold are lipids characteristic of OM or IM fraction.**

| Sr No | Outer Membrane Lipids                                   | Inner Membrane Lipids                                                                |
|-------|---------------------------------------------------------|--------------------------------------------------------------------------------------|
| 1     | <b>Ac2SGL (C56)</b>                                     | <b>Ac1PIM1 (R1CO2H+R2CO2H+R3CO2H=55:3)</b>                                           |
| 2     | <b>Alpha-MA (C89)</b>                                   | <b>Ac1PIM1 (R1CO2H+R2CO2H+R3CO2H=55:5)</b>                                           |
| 3     | Carboxylic exochelins threonine                         | <b>Ac1PIM2 (R1CO2H+R2CO2H+R3CO2H=51:3,R4=H)</b>                                      |
| 4     | <b>DAT (C25:2)</b>                                      | <b>Ac1PIM2 (R1CO2H+R2CO2H+R3CO2H=54:2,R4=H)</b>                                      |
| 5     | <b>DAT (C26:0)</b>                                      | <b>Ac1PIM2 (R1CO2H+R2CO2H+R3CO2H=49:0,R4=H)</b>                                      |
| 6     | <b>DAT (C27:0)</b>                                      | <b>Ac1PIM2 (R1CO2H+R2CO2H+R3CO2H=50:2,R4=H)</b>                                      |
| 7     | <b>DAT (C32:0)</b>                                      | <b>Ac1PIM3 (R1CO2H+R2CO2H+R3CO2H=50:0,R4=H)</b>                                      |
| 8     | <b>DAT (C37:1)</b>                                      | <b>Ac1PIM3 (R1CO2H+R2CO2H+R3CO2H=47:1,R4=H)</b>                                      |
| 9     | <b>DAG (R1CO2H+R2CO2H=30:1)</b>                         | <b>Ac1PIM3 (R1CO2H+R2CO2H+R3CO2H=47:1,R4=H)</b>                                      |
| 10    | <b>DAG (R1CO2H+R2CO2H=32:2)</b>                         | <b>Ac1PIM3 (R1CO2H+R2CO2H+R3CO2H=50:0,R4=H)</b>                                      |
| 11    | Dideoxy Mycobactins (C18:1)                             | CM (Carboxymycobactins)                                                              |
| 12    | <b>Glycosylated phthiodiolone dimycocerosate (C106)</b> | DAG (C24:2)                                                                          |
| 13    | <b>GPL-IIa/IV</b>                                       | DAG (C25:0)                                                                          |
| 14    | <b>GPL-IIb</b>                                          | DDCM (dideoxycarboxymycobactin methyl esters) (C8:1)                                 |
| 15    | <b>GPL-serovar 1</b>                                    | DDCM (dideoxycarboxymycobactin methyl esters) (C12:1)                                |
| 16    | <b>Hydroxyphthioceranic acid (C34)</b>                  | DDCM (serine butyric acid dideoxycarboxymycobactins) (C9:1)                          |
| 17    | <b>Keto-MA (C83)</b>                                    | DDCM (threonine/a-methyl serine ethylbutyric acid dideoxycarboxymycobactins ) (C6:1) |
| 18    | Lysinated PG (C20:0)                                    | L5P (lipopentapeptide)                                                               |
| 19    | Lyso PA (C20:4)                                         | L5P (Lipopentides)                                                                   |
| 20    | Lyso PE (C30:1)                                         | LPA (C16:0)                                                                          |
| 21    | Lyso PG (C14:0)                                         | LPA (Lysophosphatidic Acid) (C20:4)                                                  |
| 22    | Lyso PG (C16:0)                                         | LPE (C22:0)                                                                          |
| 23    | Lyso phosphatidic acid (C29:1)                          | LPE (C24:1)                                                                          |
| 24    | Lyso PI (C24:0)                                         | LPE (C29:1)                                                                          |
| 25    | Lyso-PA C18:2)                                          | LPG (C16:0)                                                                          |
| 26    | Lyso-PE (R1CO2H=16:1)                                   | LPG (C23:1)                                                                          |
| 27    | Lyso-PE (R1CO2H=18:0)                                   | LPI (C24:0)                                                                          |
| 28    | Lyso-PE (R1CO2H=19:1)                                   | LPI (C24:1)                                                                          |
| 29    | Lyso-PG (C17:1)                                         | LPI (Lyso phosphatidylinositols) (C13:1)                                             |

|    |                                             |                                                        |
|----|---------------------------------------------|--------------------------------------------------------|
| 30 | Lyso-PG (C19:0)                             | LPI (Lyso phosphatidylinositols) (C27:1)               |
| 31 | Lyso-PG (C21:0)                             | LPI (Lysophospholipids) (C21:1)                        |
| 32 | Lyso-PG (C23:1)                             | Lyso PA (20:4)                                         |
| 33 | Lyso-PG (C24:1)                             | Lyso-PE (R1CO2H=19:0)                                  |
| 34 | Lyso-PG (RCO2H=15:1)                        | Lyso-PG (RCO2H=17:0)                                   |
| 35 | Lyso-PG (RCO2H=18:1)                        | Lyso-PG (RCO2H=19:1)                                   |
| 36 | Lyso-PG (RCO2H=19:0)                        | Lyso-PI (RCO2H=17:0)                                   |
| 37 | Menaquinone MK-5 (II-H2) (C25:4)            | Lyso-PI (RCO2H=18:1)                                   |
| 38 | MG (RCO2H=14:0)                             | Mbt +Fe (R=17:0)                                       |
| 39 | MG (RCO2H=15:0)                             | Mbt +Fe (R=17:1)                                       |
| 40 | MG (RCO2H=16:1)                             | MDMB (Monodeoxymycobactins (C22:0)                     |
| 41 | MG (RCO2H=18:0)                             | MDMB (serine butyric acid monodeoxymycobactins)        |
| 42 | MG (RCO2H=21:0)                             | MDMB(Non-ribosomal peptide/polyketide hybrids) (C19:1) |
| 43 | MG (RCO2H=22:0)                             | MK-6 (Menaquinones) (C30:6)                            |
| 44 | MPM (C30)                                   | MMDAG (Meromycolyl diacylglycerols) (C 76:1)           |
| 45 | MPM (C32)                                   | MPM (C32)                                              |
| 46 | MPM (C33)                                   | PA (C29:2)                                             |
| 47 | MPM (C34)                                   | PA (C30:2)                                             |
| 48 | Mycobactins (C22:1)                         | PA (C33:0)                                             |
| 49 | <b>Mycocerosic acid (C27)</b>               | PA (C49:2)                                             |
| 50 | <b>Mycocerosic acid (C32)</b>               | PA (Phosphatdic Acid) (C29:1)                          |
| 51 | <b>Mycolipanic acid (C28)</b>               | PA (Phosphatdic Acid) (C30:2)                          |
| 52 | <b>Mycosanoic or Mycocersoci acid (C26)</b> | PA (Phosphatdic Acid) (C32:1)                          |
| 53 | PA (C25)                                    | PA (Phosphatdic Acid) (C33:1)                          |
| 54 | PA (C25:0)                                  | PA (Phosphatdic Acid) (C49:2)                          |
| 55 | PA (C25:1)                                  | PA (Phosphatidic Acid) (C29:1)                         |
| 56 | PA (C25:2)                                  | PA (Phosphatidic Acid) (C32:1)                         |
| 57 | PA (C28:1)                                  | PDIM A (C56:0)                                         |
| 58 | PA (C29:1)                                  | PE (25:1)                                              |
| 59 | PA (C29:2)                                  | PE (30:2)                                              |
| 60 | PA (C30:2)                                  | PE (C 34:0)                                            |
| 61 | PA (C31)                                    | PE (C 48:0)                                            |
| 62 | PA (C31:2)                                  | PE (C25:1)                                             |
| 63 | PA (C32:1)                                  | PE (C25:1)                                             |
| 64 | PA (C33:1)                                  | PE (C25:2)                                             |
| 65 | PA (C33:2)                                  | PE (C25:2)                                             |
| 66 | PA (C34:1)                                  | PE (C26:0)                                             |
| 67 | PA (C46:1)                                  | PE (C28:0)                                             |
| 68 | PE (C28:1)                                  | PE (C28:1)                                             |
| 69 | PE (C31:0)                                  | PE (C28:1)                                             |



|     |                                 |                                  |
|-----|---------------------------------|----------------------------------|
| 70  | PE (C31:1)                      | PE (C29:1)                       |
| 71  | PE (R1CO2H+R2CO2H=27:1)         | PE (C30:2)                       |
| 72  | PE (R1CO2H+R2CO2H=28:1)         | PE (C31:0)                       |
| 73  | PE (R1CO2H+R2CO2H=29:1)         | PE (C31:1)                       |
| 74  | PE (R1CO2H+R2CO2H=30:0)         | PE (C31:2)                       |
| 75  | PE (R1CO2H+R2CO2H=30:1)         | PE (C32:0)                       |
| 76  | PE (R1CO2H+R2CO2H=31:0)         | PE (C34:0)                       |
| 77  | PE (R1CO2H+R2CO2H=31:1)         | PE (R1CO2H+R2CO2H=31:0)          |
| 78  | PE (R1CO2H+R2CO2H=32:2)         | PE (R1CO2H+R2CO2H=33:1)          |
| 79  | PE (R1CO2H+R2CO2H=33:0)         | PE (R1CO2H+R2CO2H=36:0)          |
| 80  | PE (R1CO2H+R2CO2H=33:1)         | PE (R1CO2H+R2CO2H=36:2)          |
| 81  | PE (R1CO2H+R2CO2H=34:1)         | PG (26:0)                        |
| 82  | PE (R1CO2H+R2CO2H=35:1)         | PG (C24:2)                       |
| 83  | PE (R1CO2H+R2CO2H=35:2)         | PG (C26:0)                       |
| 84  | PE (R1CO2H+R2CO2H=36:2)         | PG (C26:1)                       |
| 85  | PE (R1CO2H+R2CO2H=39:1)         | PG (C28:2)                       |
| 86  | PG (C24:0)                      | PG (C31:2)                       |
| 87  | PG (C24:1)                      | PG (R1CO2H+R2CO2H=31:2)          |
| 88  | PG (C27:0)                      | PI (C 47:0)                      |
| 89  | PG (C29:1)                      | PI (C24:2)                       |
| 90  | PG (C30:2)                      | PI (C25:0)                       |
| 91  | PG (C31:2)                      | PI (C25:2)                       |
| 92  | PG (C32:2)                      | PI (C25:2)                       |
| 93  | PG (R1CO2H+R2CO2H=24:0)         | PI (C33:1)                       |
| 94  | PG (R1CO2H+R2CO2H=24:1)         | PI (R1CO2H+R2CO2H=32:2)          |
| 95  | PG (R1CO2H+R2CO2H=28:0)         | PI (R1CO2H+R2CO2H=33:1)          |
| 96  | PG (R1CO2H+R2CO2H=28:2)         | <b>PIM3 (R1CO2H+R2CO2H=31:0)</b> |
| 97  | PG (R1CO2H+R2CO2H=29:1)         | <b>PIM4 (R1CO2H+R2CO2H=34:1)</b> |
| 98  | PG (R1CO2H+R2CO2H=30:2)         | TAT (Triacyltrehalose)           |
| 99  | PG (R1CO2H+R2CO2H=31:1)         | TAT (Triacyltrehalose) (49:0)    |
| 100 | PG (R1CO2H+R2CO2H=31:2)         | <b>CL (2R1CO2H+2R2CO2H=58:2)</b> |
| 101 | PG (R1CO2H+R2CO2H=33:2)         | <b>CL (2R1CO2H+2R2CO2H=59:3)</b> |
| 102 | PG (R1CO2H+R2CO2H=34:1)         | <b>CL (2R1CO2H+2R2CO2H=59:3)</b> |
| 103 | PG (R1CO2H+R2CO2H=36:2)         | PIM1 (R1CO2H+R2CO2H=34:1)        |
| 104 | PG (R1CO2H+R2CO2H=37:0)         | PIM2 (R1CO2H+R2CO2H=35:0)        |
| 105 | PG C36:0                        | PIM3 (R1CO2H+R2CO2H=30:0)        |
| 106 | Phosphatidic acid PA (C25:2)    | PIM3 (R1CO2H+R2CO2H=33:1)        |
| 107 | Phosphatidic acids (28:1)       | PIM3 (R1CO2H+R2CO2H=36:0)        |
| 108 | Phosphatidic acids (C32:1)      | PIM6 (R1CO2H+R2CO2H=30:0)        |
| 109 | <b>Phthioceranic acid (C36)</b> |                                  |
| 110 | PI (C36:2)                      |                                  |
| 111 | PI (R1CO2H+R2CO2H=32:2)         |                                  |

|     |                                       |  |
|-----|---------------------------------------|--|
| 112 | PI (R1CO2H+R2CO2H=33:1)               |  |
| 113 | PI (R1CO2H+R2CO2H=34:1)               |  |
| 114 | PI (R1CO2H+R2CO2H=34:1)               |  |
| 115 | PI (R1CO2H+R2CO2H=36:1)               |  |
| 116 | PIM1 (R1CO2H+R2CO2H=37:2)             |  |
| 117 | <b>SL-II OR SL-II'(C167)</b>          |  |
| 118 | <b>SL-III</b>                         |  |
| 119 | <b>TDM (C169)</b>                     |  |
| 120 | TG<br>(R1CO2H+R2CO2H+R3CO2H=73:1<br>) |  |
| 121 | <b>Mycolipenic acid (C27)</b>         |  |
| 122 | <b>Mycolipenic acid (C28)</b>         |  |
| 123 | <b>Mycolipenic acid (C29)</b>         |  |

**Table S2: List of lipids identified through LCMS in PAL fraction fractions after consulting the online mycobacterial databases.**

| Sr No. | PAL Fraction              |
|--------|---------------------------|
| 1      | CL (2R1CO2H+2R2CO2H=62:0) |
| 2      | DAT (C27:0)               |
| 3      | Lyso-PE (R1CO2H=16:0)     |
| 4      | Lyso-PE (R1CO2H=17:0)     |
| 5      | Lyso-PE (R1CO2H=18:0)     |
| 6      | Lyso-PE (R1CO2H=19:1)     |
| 7      | Lyso-PE (R1CO2H=20:0)     |
| 8      | Lyso-PG (RCO2H=16:0)      |
| 9      | Lyso-PG (RCO2H=18:0)      |
| 10     | Lyso-PG (RCO2H=19:1)      |
| 11     | Lyso-PG (RCO2H=20:0)      |
| 12     | Lyso-PI (RCO2H=18:0)      |
| 13     | Lyso-PI (RCO2H=18:1)      |
| 14     | Lyso-PI (RCO2H=18:1)      |
| 15     | Lyso-PI (RCO2H=19:0)      |
| 16     | MG (RCO2H=14:0)           |
| 17     | MG (RCO2H=16:0)           |
| 18     | MG (RCO2H=16:1)           |
| 19     | MPM (C32)                 |
| 20     | Mycolipanic acid (C27)    |
| 21     | PE (R1CO2H+R2CO2H=31:0)   |
| 22     | PE (R1CO2H+R2CO2H=33:1)   |
| 23     | PE (R1CO2H+R2CO2H=36:0)   |
| 24     | PE (R1CO2H+R2CO2H=36:2)   |
| 25     | PG (R1CO2H+R2CO2H=30:2)   |
| 26     | PG (R1CO2H+R2CO2H=31:0)   |

|    |                                      |
|----|--------------------------------------|
| 27 | PG (R1CO2H+R2CO2H=31:2)              |
| 28 | PG (R1CO2H+R2CO2H=37:0)              |
| 29 | PG<br>(R1CO2H+R2CO2H=30:2)           |
| 30 | PG<br>(R1CO2H+R2CO2H=36:2)           |
| 31 | PG<br>(R1CO2H+R2CO2H=37:0)           |
| 32 | PI (R1CO2H+R2CO2H=33:2)              |
| 33 | PI (R1CO2H+R2CO2H=34:1)              |
| 34 | PI (R1CO2H+R2CO2H=37:1)              |
| 35 | PI (R1CO2H+R2CO2H=42:1)              |
| 36 | PIM1 (R1CO2H+R2CO2H=32:1)            |
| 37 | PIM1<br>(R1CO2H+R2CO2H=37:0)         |
| 38 | Hydroxyphthioceranic acid (C39)      |
| 39 | Hydroxyphthioceranic acid (C40)      |
| 17 | Mycocerosic acid (C30)               |
| 18 | Mycocerosic acid (C32)               |
| 19 | Mycocerosic acid (C35)               |
| 20 | DG (R1CO2H+R2CO2H=33:0)              |
| 21 | DAG (R1CO2H+R2CO2H=34:2)             |
| 22 | Mycolipanic acid (C26)               |
| 23 | Mycolipenic acid (C27)               |
| 24 | Mycolipenic acid (C28)               |
| 25 | Mycolipenic acid (C29)               |
| 26 | Mycosanoic or Mycocerosic acid (C24) |
| 30 | Phthioceranic acid (C36)             |
| 31 | Phthioceranic acid (C45)             |

## SI Materials

### KEY RESOURCES TABLE

| REAGENT or RESOURCE                                  | SOURCE                            | IDENTIFIER         |
|------------------------------------------------------|-----------------------------------|--------------------|
| <b>Antibodies</b>                                    |                                   |                    |
| Monoclonal Anti-Mycobacterium smegmatis LAM          | BEI resources                     | Cat # NR-13798     |
| Pierce Goat Anti-Mouse HRP conjugate                 | ThermoScientific                  | Cat # 31430        |
| <b>Fluorophores</b>                                  |                                   |                    |
| 16:0 LissRhod PE                                     | Avanti Polar Lipids               | Cat # 810158       |
| TopFluor Cholesterol                                 | Avanti Polar lipids               | Cat # 810255       |
| 1,6-Diphenyl-1,3,5-hexatriene                        | Sigma-Aldrich                     | Cat # D208000      |
| 6-dodecanoyl-N,N-dimethyl-2-naphthamine              | Sigma-Aldrich                     | Cat # 40227        |
| TMA-DPH                                              | Cayman Chemical Company           | Cat # 17294        |
| <b>Bacterial and Virus Strains</b>                   |                                   |                    |
| <i>Mycobacterium smegmatis</i> mc <sup>2</sup> 155   | Prof. Roop Lal (Delhi University) | Generous gift      |
| <b>Chemicals, Peptides, and Recombinant Proteins</b> |                                   |                    |
| Middlebrook 7H9 Broth Base                           | HiMedia                           | Cat # M198         |
| Bovine Serum Albumin                                 | HiMedia                           | Cat # MB083        |
| $\alpha$ -D-Glucose                                  | SIGMA-ALDRICH                     | Cat # 158968       |
| Catalase from bovine liver                           | SIGMA-ALDRICH                     | Cat # C9322        |
| Glycerol Anhydrous                                   | EMPARTA                           | Cat # 1.07051.0521 |
| Diocetyl Sulfosuccinate Sodium Salt                  | SIGMA-ALDRICH                     | Cat # 323586       |
| n-Heptane                                            | EMPARTA                           | Cat # 1.07053.0521 |
| Chloroform                                           | EMAPRTA                           | Cat # 1.07024.2521 |
| Chloroform (For UV Spectroscopy)                     | Spectrochem                       | Cat # 050304       |
| Lysozyme                                             | HiMedia                           | Cat # MB098        |
| Phosphomolybdic Acid                                 | Loba Chemie                       | Cat # 51429-74-4   |
| Anthrone                                             | Sigma-Aldrich                     | Cat # 319899       |
| Deuterium oxide                                      | Sigma-Aldrich                     | Cat # 151882       |
| Trizma base                                          | Sigma-Aldrich                     | Cat # T1503        |
| Magnesium chloride hexahydrate                       | Sigma-Aldrich                     | Cat # M2393        |
| Magnesium Chloride anhydrous                         | Spectrochem Pvt. Ltd.             | Cat # 0113205      |
| Sulphuric Acid                                       | EMPARTA                           | Cat # 1.93000.0521 |
| Tween 80                                             | Merck                             | Cat # 8.22187.0521 |
| N,N'-Methylenebisacrylamide                          | Sigma-Aldrich                     | Cat # M7279        |
| Acrylamide                                           | HiMedia                           | Cat # MB068        |

|                                                                              |                                  |                              |
|------------------------------------------------------------------------------|----------------------------------|------------------------------|
| N,N,N',N'-Tetramethylethylenediamine                                         | Sigma-Aldrich                    | Cat # T9281                  |
| Ammonium persulfate                                                          | Sigma-Aldrich                    | Cat # A3678                  |
| Glycine                                                                      | EMPARTA                          | Cat # 1.94907.0521           |
| Tetrabutylammonium Hydroxide                                                 | Spectrochem Pvt. Ltd.            | Cat # 0120274                |
| Methyl Iodide                                                                | Spectrochem Pvt. Ltd.            | Cat # 011361                 |
| Acetonitrile For Chromoatography                                             | EMPARTA                          | Cat #<br>61803025001730      |
| Methanol Spectroscopic grade                                                 | Sigma-Aldrich                    | Cat # 154903                 |
| Ethanol absolute                                                             | CSS                              |                              |
| Sodium dodecyl sulfate                                                       | EMPLURA                          | Cat # 1.94954.0521           |
| Bromophenol Blue                                                             | HiMedia                          | Cat # MB123                  |
| Phenol                                                                       | EMPARTA                          | Cat # 1.94903.0521           |
| Petroleum Ether                                                              | Detec                            | Cat # V800297                |
| Dichloromethane                                                              | MembaChem<br>Industried Pvt.Ltd. | Cat # 300126                 |
| 1, 2 –dioleoyl-sn-glycero-3-phosphocholine (DOPC)                            | Avanti Polar Lipids              | Cat # 850375P                |
| 1, 2 dipalmitoyl –sn-glycero-3 phospho- (1'-rac-glycerol) sodium salt (DPPG) | Avanti Polar Lipids              | Cat # 840455                 |
| Phosphate buffer Saline                                                      | HiMedia                          | Cat # RM7385                 |
| Diethyl ether                                                                | RANKEM                           | Cat # D2320                  |
| Hydrochloric acid                                                            | EMPARTA                          | Cat # 1.93001.0521           |
| Tricine                                                                      | Sigma Aldrich                    | Cat # T0377                  |
| Mycolic acids                                                                | Sigma Aldrich                    | Cat # M4537                  |
| <b>Software and Algorithms</b>                                               |                                  |                              |
| IgorPro 6.37                                                                 | Wavemetrics                      | Cat # Igor Pro<br>(Freeware) |
| Asylum Research version 14.30.157                                            | Asylum Research                  | Freeware                     |
| Zen Lite 2.3                                                                 | Carl Zeiss                       | Freeware                     |
| GRAMS/AI™ Spectroscopy Software                                              | Thermo Scientific                | Cat # INF-15000              |
| GraphPad Prism                                                               | GraphPad Ver. 5.0                |                              |
| <b>Other</b>                                                                 |                                  |                              |
| TLC silica gel 60 F <sub>254</sub>                                           | Merck                            | Cat # 1.05554.007            |
| Silica gel 100-200 mesh                                                      | Finar                            | Cat # 11448S5K25             |
| ITO coated cover slips                                                       | SPI Supplies                     | Cat # 06486-AB               |
| PELCO Mica Discs 9.9mm Diamter                                               | Ted Pella, Inc                   | Cat # 50                     |
| AFM Probe                                                                    | Asylum Research                  | Cat # BL-TR400PB             |
| Cell Culture Dish 60mm*15mm                                                  | Genaxy                           | Cat # GEN-PTD-60             |
| C18 LCMS column                                                              | Thermoscientific                 | Cat # 25003-102130           |
